# Supplementary material for: Label-free molecular mapping and assessment of glycogen inC. elegans
Source: Royal Society of Chemistry journal article supplement (doi:10.1039/c8an02351d), 2019-01-01
Supplement: c8an02351d1.pdf [file c8an02351d1.pdf]

## Electronic Supplementary Information

### Label-free molecular mapping and assessment of glycogen in *C. elegans*

Andriy Cherkas<sup>a,b\*</sup>, Abdullah Saif Mondol<sup>c\*</sup>, Jan Rüger<sup>c</sup>, Nadine Urban<sup>a</sup>, Jürgen Popp<sup>c,d</sup>, Lars-Oliver Klotz<sup>a</sup> and Iwan W. Schie<sup>c</sup>

<sup>a</sup>Institute of Nutritional Sciences, Nutrigenomics, Friedrich Schiller University Jena, Jena, Germany.

<sup>b</sup>Department of Internal Medicine #1, Lviv National Medical University, Lviv, Ukraine

<sup>c</sup>Leibniz Institute of Photonic Technology Jena, Germany

<sup>d</sup>Institute of Physical Chemistry and Abbe Center of Photonics, Friedrich-Schiller University Jena, 07743 Jena, Germany

Corresponding Author: [iwan.schie@leibniz-ipht.de](mailto:iwan.schie@leibniz-ipht.de)

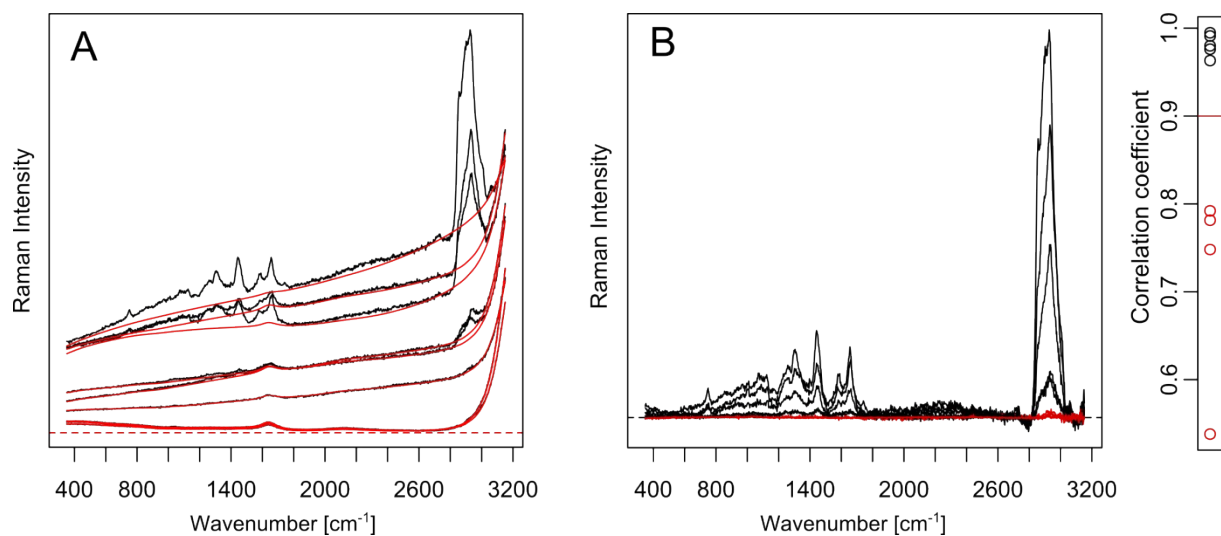

**Fig. S1** Raman spectra were background corrected employing Extended Multiplicative Scattering Correction (EMSC) using representative spectra from water and *C. elegans*, respectively. 9 randomly chosen spectra from the dataset are displayed together with the estimated background (red) in the left panel (A). After background correction Pearson's correlation coefficients for all spectra are calculated regarding the aforementioned reference spectrum of *C. elegans* and those spectra with coefficients below 0.9 were discarded from the dataset. 4 out of 9 randomly chosen spectra (red) can be identified as pure water spectra (B).

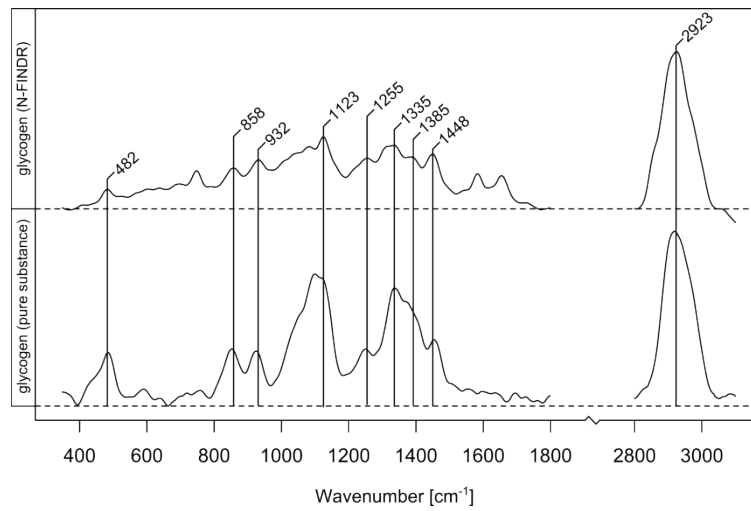

**Fig. S2** Applying N-FINDR algorithm on the whole spectral dataset reveals a single Raman spectrum (top panel), which resembles a pure glycogen spectrum (bottom panel) taken from a powder sample.
